# Supplementary material for: Transcriptional Repression of High-Mobility Group Box 2 by p21 in Radiation-Induced Senescence
Source: PubMed Central journal article supplement — Mol Cells. 2018 Feb 28;41(4):362–72. doi: 10.14348/molcells.2018.2291 (PMC5935093; doi:10.14348/molcells.2018.2291), 2018-02-28
Supplement: molce-41-4-362-suppl.pdf [file molce-41-4-362-suppl.pdf]

## Supplementary Fig. 1

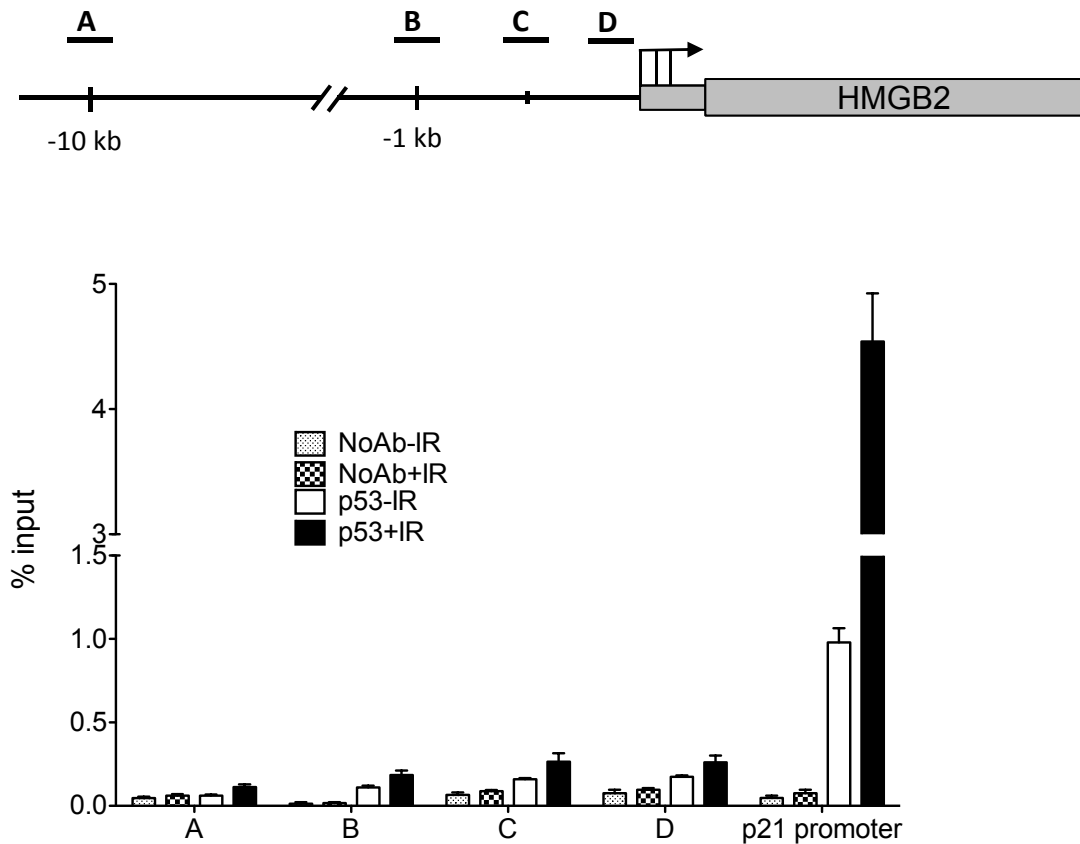

Supplementary Fig. S1. p53 does not bind to the HMGB2 promoter region.

The results are expressed as the relative enrichment of promoter DNA (regions B, C, and D) in chromatin immunoprecipitated with anti-p53 antibodies with respect to input DNA. The diagram shown indicates the location of the amplicon, the TSS (arrow), and the HMGB2 gene (shadow box). Amplicons containing p53-binding elements located in the CDKN1A (p21) promoter region were used as a positive control for the ChIP experiment.

## Supplementary Fig. 2

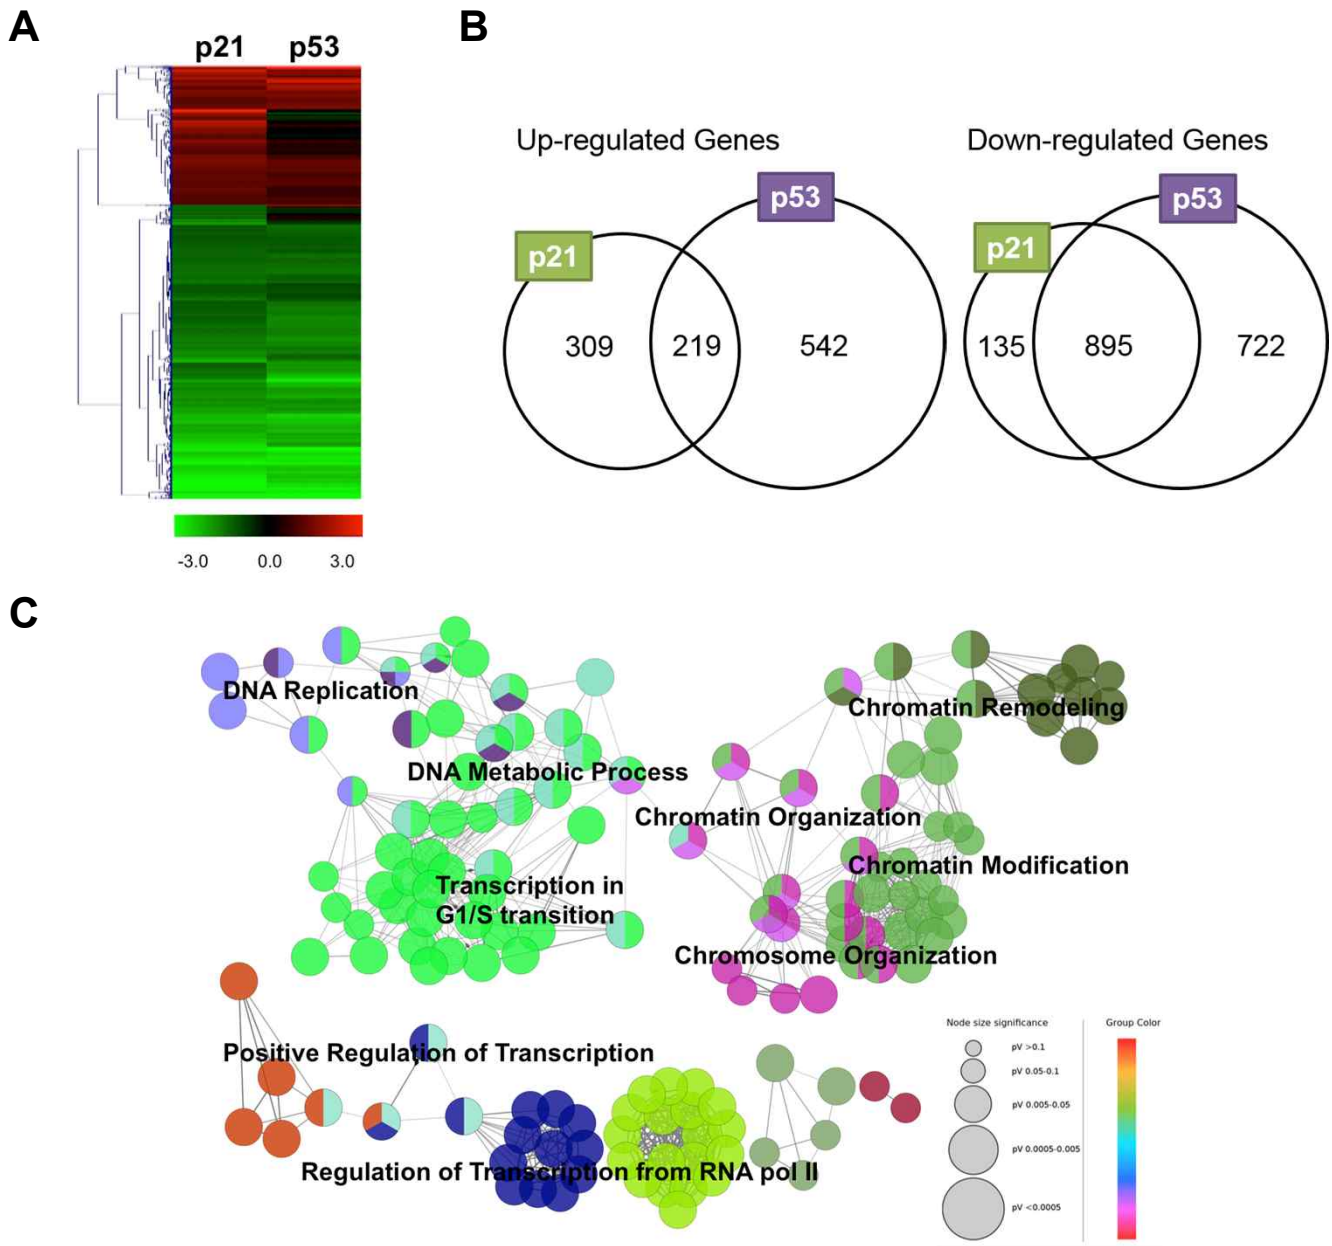

Supplementary Fig. S2. Genome-wide analysis of p53- and p21-mediated gene expression.

(A) Microarray analysis was performed after induction of p21 and p53 using the Tet-On conditional expression system. (B) The number of genes regulated by p53 and p21 by more than two-fold are shown with a Venn diagram. (C) KEGG pathway analysis of p21-mediated downregulated genes.

Supplementary Table 1. Primer sequences used for qRT-PCR

| Gene              | Accession No. | Primer Sequences                                                 |
|-------------------|---------------|------------------------------------------------------------------|
| <b>PPIA/CYPA</b>  | NM_021130.3   | 5'-CCCACCGTGTTCTTCGACAT-3'<br>5'-CCAGTGCTCAGAGCACGAAA-3'         |
| <b>RPL13A</b>     | NM_012423.2   | 5'-CCTGGAGGAGAAGAGGAAAGAGA-3'<br>5'-TTGAGGACCTCTGTGTATTTGTCAA-3' |
| <b>HMGB2</b>      | NM_002129.6   | 5'-CTTGGCACGATATGCAGCAA-3'<br>5'-CAGCCAAAGATAAACAACCATATGA-3'    |
| <b>CDKN1A/p21</b> | NM_000389.4   | 5'-CTGCGCCAGCTGAGGTGTGAG-3'<br>5'-GCCGCATGGGTTCTGACGGA-3'        |
| <b>TP53</b>       | NM_000546     | 5'-CTGCCTCCGGGTCCTACTGCC-3'<br>5'-TTGGGACGGCAAGGGGGACA-3'        |
| <b>Rb</b>         | NM_000321.2   | 5'-GCTTGGTAACTTGGGAGAA-3'<br>5'-AGGTCAACTGCTGCAATAAA-3'          |
| <b>E2F1</b>       | NM_005225.2   | 5'-CCCAACTCCCTCTACCCTTGA-3'<br>5'-TCTGTCTCCCTCCCTCACTTTC-3'      |
| <b>NF-YB</b>      | NM_006166.3   | 5'-GCCGATTGGAGACGGGAGCC-3'<br>5'-ACCGTGTTGTCAGTGGTGCTGA-3'       |

Supplementary Table 2. Primer sequences used for ChIP-qPCR

| Gene              | Location from TSS/Ref | Primer Sequences                                            |
|-------------------|-----------------------|-------------------------------------------------------------|
| <b>HMGB2-A</b>    | -10,000               | 5'-CTTGGCCTTCAGATGGGATA-3'<br>5'-TAAAGGGTGCGGTATCAAGC-3'    |
| <b>HMGB2-B</b>    | -980 ~ -1096          | 5'-GCTGTATGCCGTTTGGAGAA-3'<br>5'-GGCATTCACTGTCTCGTCCT-3'    |
| <b>HMGB2-C</b>    | -606 ~ -402           | 5'-TACGACAACCTCAGCGACAG-3'<br>5'-TTCCTCCGACCACCATTAG-3'     |
| <b>HMGB2-D</b>    | -244 ~ -24            | 5'-TTACCTTAGCGCCAGCAAAC-3'<br>5'-CCGGTCAGGAGAGGAATGTA-3'    |
| <b>CDKN1A/p21</b> | (Lagger et al., 2003) | 5'-AGCAGGCTGTGGCTCTGATT-3'<br>5'-CAAAATAGCCACCAGCCTCTTCT-3' |

Supplementary Table 3. siRNAs used for gene knockdown

| Gene              | siRNA Sequence            |
|-------------------|---------------------------|
| <b>CDKN1A/p21</b> | CUGUACUGUUCUGUGUCUUdTdT   |
| <b>TP53</b>       | GCCAAGUCUGUGACUUGCACGUACU |
| <b>Rb</b>         | GAUACCAGAUCAUGUCAGAdTdT   |
| <b>E2F1</b>       | UGGACCACCUGAUGAAUAUdTdT   |
| <b>NF-YB</b>      | GGCAUUUACUAACCAGUUAdTdT   |
| <b>Control</b>    | CCUACGCCACCAAUUUCGUdTdT   |
